# Supplementary material for: Human beige adipocytes for drug discovery and cell therapy in metabolic diseases
Source: PubMed Central journal article supplement (PMC7265435; doi:10.1038/s41467-020-16340-3), 2020-06-02
Supplement: 41467_2020_16340_MOESM5_ESM.pdf [file 41467_2020_16340_MOESM5_ESM.pdf]

**Title:** Supplementary Data 1.

**Description:** Dose-response and validation assays of compounds identified in the primary screen. Beige adipocytes were differentiated from ADSCs for 21 days in 384-well plates and treated with compounds overnight at indicated doses in quadruplicate. Data are expressed as a percentage of control (DMSO).

**Title:** Supplementary Data 2.

**Description:** Average CT values for qRT-PCR data.
